# Supplementary material for: Osteoclast microRNA Profiling in Rheumatoid Arthritis to Capture the Erosive Factor
Source: PubMed Central journal article supplement (PMC10443079; doi:10.1002/jbm4.10776), 2023-06-05
Supplement: JBM4-7-e10776-s001.pdf [file JBM4-7-e10776-s001.pdf]

***Supplemental Table 3: Clinical and demographic variables integrated in machine learning models***

**Supplementary Table 3: Clinical and demographic variables integrated in machine learning models**

|                            |                                                        |
|----------------------------|--------------------------------------------------------|
| Sex                        | RF                                                     |
| Age                        | Anti-CCP                                               |
| Weight (kg)                | CRP                                                    |
| Height (m)                 | Methotrexate use                                       |
| BMI                        | Methotrexate dose                                      |
| Menopausal status          | DMARD (other) use                                      |
| Smoking (no, active, past) | DMARD name                                             |
| Alcohol (no, active, past) | Biologics use                                          |
| Serum 25OH-VitD            | Biologics name                                         |
| Morning stiffness          | Prednisone use                                         |
| SJC66                      | Prednisone dose                                        |
| TJC68                      | regular NSAID use                                      |
| HAQ                        | Osteoporosis treatment (Biphosphonate, denosumab) use  |
| DAS28                      | Osteoporosis treatment (Biphosphonate, denosumab) name |
|                            | Calcium-vitamin D use                                  |
