# Supplementary material for: Osteoclast microRNA Profiling in Rheumatoid Arthritis to Capture the Erosive Factor
Source: PubMed Central journal article supplement (PMC10443079; doi:10.1002/jbm4.10776), 2023-06-05
Supplement: JBM4-7-e10776-s002.pdf [file JBM4-7-e10776-s002.pdf]

# *Supplemental Table 1: List of the 25 miRs studied by qPCR*

| <b>miR</b>             | <b>Forward Sequence</b>  | <b>Reverse Sequence</b> |
|------------------------|--------------------------|-------------------------|
| hsa-miR-106a-5p.SpFwd2 | CGCTGCGTAAAAGTGCTTACAG   | GTGCAGGGTCCGAGGT        |
| hsa-miR-1246.SpFwd1    | GCTGTTCGAATGGATTTTTGG    | GTGCAGGGTCCGAGGT        |
| hsa-miR-152-3p.SpFwd2  | GCTGTGTCAGTGCATGACA      | GTGCAGGGTCCGAGGT        |
| hsa-miR-15b-5p.SpFwd1  | GCGTAGCAGCACATCAT        | GTGCAGGGTCCGAGGT        |
| hsa-miR-193b-3p.SpFwd2 | GCGCAACTGGCCCTCAA        | GTGCAGGGTCCGAGGT        |
| hsa-miR-194-5p.SpFwd1  | CGCTGCGTTGTAACAGCAACTC   | GTGCAGGGTCCGAGGT        |
| hsa-miR-200c-3p.SpFwd2 | TGGTCGTAATACTGCCGGTA     | GTGCAGGGTCCGAGGT        |
| hsa-miR-23ab-3p.SpFwd1 | GCGCATCACATTGCCAGGG      | GTGCAGGGTCCGAGGT        |
| hsa-miR-15b-3p.SpFwd1  | CGCTGCGTCGAATCATTATTTG   | GTGCAGGGTCCGAGGT        |
| hsa-miR-147b-5p.SpFwd1 | CGCTGCGTTGGAACATTTCTG    | GTGCAGGGTCCGAGGT        |
| hsa-miR-25-3p.SpFwd2   | GCTGTGCGATTGCACTTGTCT    | GTGCAGGGTCCGAGGT        |
| hsa-miR-29b-3p.SpFwd3  | GCGTAGCACCATTTGAAA       | GTGCAGGGTCCGAGGT        |
| hsa-miR-34a-3p.SpFwd1  | CGCTGCGTCAATCAGCAAGTAT   | GTGCAGGGTCCGAGGT        |
| hsa-miR-365b-3p.SpFwd1 | CGCTGCGTTAATGCCCTAAA     | GTGCAGGGTCCGAGGT        |
| hsa-miR-374a-5p.SpFwd2 | GCGGCGTTTATAATAACAACCTGA | GTGCAGGGTCCGAGGT        |
| hsa-miR-142-5p.SpFwd2  | GCGGCGCATAAAGTAGAAAGC    | GTGCAGGGTCCGAGGT        |
| hsa-miR-454-3p.SpFwd1  | CGCTGCGTTAGTGCAATATTG    | GTGCAGGGTCCGAGGT        |
| hsa-miR-511-3p.SpFwd1  | CGCTGCGTAATGTGTAGCAA     | GTGCAGGGTCCGAGGT        |
| hsa-miR-7-1-3p.SpFwd1  | TGGTCGGCAACAAATCACAGT    | GTGCAGGGTCCGAGGT        |
| hsa-miR-7706.SpFwd1    | GCGTGAAGCGCCTGTGCTC      | GTGCAGGGTCCGAGGT        |
| hsa-miR-1-3p.SpFwd1    | CGCTGCGTTGGAATGTAAGAA    | GTGCAGGGTCCGAGGT        |
| hsa-miR-206.SpFwd1     | CGCTGCGTTGGAATGTAAGAA    | GTGCAGGGTCCGAGGT        |
| hsa-miR-374c-5p.SpFwd1 | CGCTGCGTATAATAACAACCTGC  | GTGCAGGGTCCGAGGT        |
| hsa-miR-374a-3p.SpFwd2 | CGCTGCGTCTTATCAGATTGTA   | GTGCAGGGTCCGAGGT        |
| hsa-miR-17-5p.SpFwd2   | GCTGTGCGAAAGTGCTTACAGT   | GTGCAGGGTCCGAGGT        |

## *housekeeping gene*

small nuclear RNA U6 (snU6) GCTCGCTTCGGCAGCACATA ACGCTTCACGAATTGCGTGTC
