# Supplementary material for: Osteoclast microRNA Profiling in Rheumatoid Arthritis to Capture the Erosive Factor
Source: PubMed Central journal article supplement (PMC10443079; doi:10.1002/jbm4.10776), 2023-06-05
Supplement: JBM4-7-e10776-s003.pdf [file JBM4-7-e10776-s003.pdf]

# Supplemental Table 2: List of primers (target gene expression)

Supplemental Table 2: list of primers (target gene expression)

| genes                     | protein / enzyme                                                             | Forward Sequence            | Reverse Sequence            |
|---------------------------|------------------------------------------------------------------------------|-----------------------------|-----------------------------|
| <i>ABI2</i>               | Abl Interactor 2; actin cytoskeleton dynamics                                | TGCTGTGGTTGAGTATAGTGATCCTT  | GGACAGCTCATCTTCTTGTCTTTTG   |
| <i>ADA</i>                | Adenosine Deaminase                                                          | CGCTCACCCCTCCAGACTTCCT      | CGCACCTCCACATACACCACG       |
| <i>AKT1</i>               | AKT Serine/Threonine Kinase 1                                                | AGGGTTGGCTGCACAAACGAG       | GCCACAGAGAAGTTGTTGAGGGG     |
| <i>AKT3</i>               | AKT Serine/Threonine Kinase 3                                                | TTGGTGGAGGACCAGATGATGC      | ATCTTGCCAGTTTACTCCAGAGAAG   |
| <i>ANKRD11</i>            | Ankryin repeat domain-containing protein                                     | CGAGCCGCCATCCGCG            | CGTCGTAGTAGCCCCGGTTACA      |
| <i>AXIN2</i>              | Axin-related protein,beta-catenin stability                                  | GCCACACCTTCTCCAATCCAA       | AGCCTTACAGCATCCTCCGGT       |
| <i>CCND1</i>              | Cyclin D1; regulator of CDK kinases                                          | CCTCACACGCTTCTCTCCAGA       | CTCTCTCTTCTCTCCTCTCG        |
| <i>CD200</i>              | CD200                                                                        | AGAATCAGGTGGGGAAAGGAGT      | TTGAGATTAGGACGAGAAGAATTACCA |
| <i>CD274</i>              | CD274                                                                        | AGGCTCCGCACCAGCCG           | CGTTCAGCAAATGCCAGTAGGT      |
| <i>CD38</i>               | CD38                                                                         | TCCGGGCACCACCAAGCG          | ATGCACCTTGAAAGCATCCCA       |
| <i>CD80</i>               | CD80                                                                         | CGCAGAAGCAAAGGGGCTGAAAA     | ACGTAAAGGGCAAGGTGGGGT       |
| <i>CD86</i>               | CD86                                                                         | ACCAACACAATGGAGAGGGAAGAGA   | TCGAACTTTTAAAAACACGCTGGGC   |
| <i>CSF1R</i>              | MCSF-R                                                                       | CCCCAGCCCAACGTGACAT         | CAGGCTCTGCACCGTACCT         |
| <i>DOK2</i>               | Docking Protein 2                                                            | GGCGCTTTGGGCGGGACAAG        | GCAGAGATGGCCTCTCCAGGG       |
| <i>ENTPD1</i>             | Ectonucleoside Triphosphate Diphosphohydrolase 1                             | GCAACTACCCCTTTGACTTCCA      | GGACTATGCTGAACCACCTTGT      |
| <i>GXYLT1</i>             | Xylosyltransferase                                                           | TGCTGAAGATCAGCTACATCATAGCT  | TTCTCACTGGAAAGGTTATGGGGT    |
| <i>ICOSLG</i>             | Inducible T Cell Costimulator Ligand                                         | GGGCTTGATGACGTGGTCAGC       | TGTGATCTTGTCTCTCTCCGA       |
| <i>IDO1</i>               | Indoleamine 2,3-Dioxygenase 1                                                | AAGGAGTTTGACAGGGGGCAGT      | AAGTTCCTGTGAGCTGGTGGA       |
| <i>KLF4</i>               | Kruppel Like Factor 4                                                        | CCCCATCCAAGGCACACTGC        | CATTTTTGGCATTGGAACGGGC      |
| <i>MITF</i>               | Melanocyte Inducing Transcription Factor                                     | CGCAACCGGCATTTGTGTC         | AATCTGGAGACGAGACCCCGT       |
| <i>NT5E</i>               | 5'-Nucleotidase Ecto                                                         | TTGCACTGGGACATTCGGGTTT      | GGCACCTCTTTGGAAGGTGGATT     |
| <i>PADI4</i>              | Peptidyl Arginine Deiminase 4                                                | GCCAAGAAGAAATCCACAGGTTT     | TGGTGGAGTCTTGGGTCCGTAG      |
| <i>PLEKHA2</i>            | Pleckstrin Homology Domain Containing A2                                     | AAGATATGAAGGACTGGGTTGAAGCC  | GAACCTCAGTGGTCATGGGTAGGC    |
| <i>PRKAA1</i>             | Protein Kinase AMP-Activated Catalytic Subunit Alpha                         | GTGTACGAAGGAAGAATCCTGTGACA  | GGAGTAGCAGTCCCTGATTTGGC     |
| <i>PRKAA2</i>             | Protein Kinase AMP-Activated Catalytic Subunit Alpha                         | TTGACCCACTGAAACGAGCAACT     | TTCACACACTTCTTTCACAGCCTCA   |
| <i>PTEN</i>               | Phosphatase And Tensin Homolog                                               | ATTCACAGTCAAGGGCGCTAT       | TCATCTTGTGAAAACAACAGTGCCA   |
| <i>SHCBP1</i>             | SHC Binding And Spindle Associated 1                                         | AGGAGCTGTGGGTGGTGTGTA       | TCATCCTCTCTTCTTCATCCCACT    |
| <i>SIRT1</i>              | Sirtuin1                                                                     | GCTGGAACAGGTTGCGGGAATC      | TCTCTCGTACAGCTTCACAGTCA     |
| <i>SNRK</i>               | sucrose nonfermenting-related kinase                                         | TCATTCAGCGCATGGTGCTTGG      | CAGCAGGAAGTATGTGGCTGTGA     |
| <i>SOX5</i>               | SRY-Box Transcription Factor 5                                               | AACAGGCGGCAGGAAATGCG        | GGCAGGTGAGGGGAGGGCAT        |
| <i>TNFRSF14</i>           | TNF Receptor Superfamily Member 14                                           | AGCTGCCGCTCTGAGCCTGA        | CTGGGGCGTAGCAGGGGGC         |
| <i>WDYHV1</i>             | NTAQ1, N-Terminal Glutamine Amidase 1                                        | GTCTGATGATGACATTCACCCACAGT  | CAATGCAGGGATATGGCGGCG       |
| <i>YWHAQ</i>              | Tyrosine 3-Monooxygenase/Tryptophan 5-Monooxygenase Activation Protein Theta | AAAGTGGAGTCCGAGCTGAGAT      | ACTCTCTGGATTAGTTGCATTGGC    |
| <i>housekeeping genes</i> |                                                                              |                             |                             |
| <i>MRPL19</i>             | Mitochondrial Ribosomal Protein L19                                          | AAGGAGAAAAGTACTCCACATTCAGAG | TGGGTCACTGTAGTAACACGA       |
| <i>YWHAZ</i>              | Tyrosine 3-Monooxygenase/Tryptophan 5-Monooxygenase Activation Protein Zeta  | TCCCCAATGCTTCACAAGCAGA      | TCTTGTATCACCAGCGGCAA        |
| <i>PUM1</i>               | Pumilio homolog 1                                                            | TGAGGTGTGCACCATGAAC         | CAGAAATGTGCTTGCATAGG        |

In the shaded boxes are the selected genes concomitantly regulated by the 5 miRs whose expression levels were different between groups (E, NE, controls).
